# Supplementary material
Source: publisher site journal article supplement (https://www.dovepress.com/article/595054)
Supplement: Supplementary file 1 [file 595054%20Supplementary%20Tables%201-3.docx]

**Supplementary Table**

**Table S1. Association Between Prognostic Nutritional Index (PNI) and All-Cause and Cardiovascular Mortality After Excluding Individuals with Isolated Sleepy Phenotype**

| Exposure | Outcome | Model 1 |  |  | Model 2 |  |  | Model 3 |  |
| --- | --- | --- | --- | --- | --- | --- | --- | --- | --- |
| HR(95%CI) | *P-*value |  | HR(95%CI) | *P*-value |  | HR(95%CI) | *P*-value |
| PNI  (continuous) | All-cause mortality | 0.92(0.89,0.95) | ＜0.001 |  | 0.97(0.94,1.01) | 0.180 |  | 0.93(0.90,0.95) | ＜0.001 |
| *PNI tertile* |  |  |  |  |  |  |  |  |  |
| T1(lowest) |  | Reference |  |  | Reference |  |  | Reference |  |
| T2(middle) |  | 0.44(0.37,0.53) | ＜0.001 |  | 0.66(0.53,0.82) | ＜0.001 |  | 0.66(0.53,0.82) | ＜0.001 |
| T3(highest) |  | 0.34(0.28,0.41) | ＜0.001 |  | 0.70(0.57,0.86) | ＜0.001 |  | 0.58(0.45,0.73) | ＜0.001 |
| *P* for trend |  | ＜0.001 |  |  | ＜0.001 |  |  | ＜0.001 |  |
| PNI  (continuous) | Cardiovascular mortality | 0.88(0.85,0.91) | ＜0.001 |  | 0.94(0.91,0.97) | ＜0.001 |  | 0.94(0.90,0.98) | 0.003 |
| *PNI tertile* |  |  |  |  |  |  |  |  |  |
| T1(lowest) |  | Reference |  |  | Reference |  |  | Reference |  |
| T2(middle) |  | 0.41(0.27,0.62) | ＜0.001 |  | 0.68(0.44,1.03) | 0.070 |  | 0.71(0.46,1.10) | 0.120 |
| T3(highest) |  | 0.23(0.17,0.30) | ＜0.001 |  | 0.55(0.40,0.76) | ＜0.001 |  | 0.56(0.35,0.87) | 0.011 |
| *P* for trend |  | ＜0.001 |  |  | ＜0.001 |  |  | 0.009 |  |

Note: Cox models were repeated after excluding individuals with isolated sleepy symptoms, with adjustments identical to Table S2. PNI was analyzed as a continuous variable and tertiles (T1 as reference), and P for trend was calculated across tertiles.

**Table S2. Association Between Prognostic Nutritional Index (PNI) and All-Cause and Cardiovascular Mortality in Patients with STOP-Defined OSA**

| Exposure | Outcome | Model 1 |  |  | Model 2 |  |  | Model 3 |  |
| --- | --- | --- | --- | --- | --- | --- | --- | --- | --- |
| HR(95%CI) | *P-*value |  | HR(95%CI) | *P*-value |  | HR(95%CI) | *P*-value |
| PNI  (continuous) | All-cause mortality | 0.96(0.90,1.02) | 0.17 |  | 1.00(0.96,1.03) | 0.90 |  | 0.95(0.91,0.98) | 0.002 |
| *PNI tertile* |  |  |  |  |  |  |  |  |  |
| T1(lowest) |  | Reference |  |  | Reference |  |  | Reference |  |
| T2(middle) |  | 0.57(0.44,0.75) | ＜0.001 |  | 0.74(0.55,0.98) | 0.04 |  | 0.75(0.54,1.05) | 0.10 |
| T3(highest) |  | 0.41(0.32,0.52) | ＜0.001 |  | 0.68(0.54,0.88) | 0.003 |  | 0.64(0.49,0.82) | ＜0.001 |
| *P* for trend |  | ＜0.001 |  |  | 0.003 |  |  | 0.001 |  |
| PNI  (continuous) | Cardiovascular mortality | 0.89(0.85,0.92) | ＜0.001 |  | 0.94(0.90,0.98) | 0.002 |  | 0.96(0.92, 1.00) | 0.06 |
| *PNI tertile* |  |  |  |  |  |  |  |  |  |
| T1(lowest) |  | Reference |  |  | Reference |  |  | Reference |  |
| T2(middle) |  | 0.54(0.33,0.88) | 0.01 |  | 0.76(0.47,1.23) | 0.26 |  | 0.84(0.48, 1.45) | 0.52 |
| T3(highest) |  | 0.23(0.15,0.36) | ＜0.001 |  | 0.47(0.29,0.76) | 0.002 |  | 0.59(0.33, 1.04) | 0.07 |
| P for trend |  | ＜0.001 |  |  | 0.005 |  |  | 0.118 |  |

Note: Cox proportional hazards models were used to estimate hazard ratios (HRs) and 95% confidence intervals (CIs) for the associations between PNI (continuous and tertiles) and all-cause and cardiovascular mortality. Model 1 was unadjusted; Model 2 and Model 3 were progressively adjusted for demographic and clinical covariates. P for trend was calculated across tertiles (T1 as reference).

**Table S3. Baseline Demographic and Clinical Characteristics of Participants According to OSA Severity**

|  | Mild OSA  （n=92） | Moderate OSA（n=108） | Severe OSA（n=355） | *P*值 |
| --- | --- | --- | --- | --- |
| Age(years) | 52.96±15.64 | 55.56±13.95 | 52.13±13.62 | 0.086 |
| *Gender (%)* |  |  |  | 0.275 |
| Male | 63(68.50) | 78(72.20) | 271(76.30) |  |
| Female | 29(31.50) | 30(27.80) | 84(23.70) |  |
| BMI(kg/m2) | 26.35(24.34,29.38) | 26.70(24.45,30.21) | 28.73(26.22,31.60) | <0.001 |
| *Smoking,n(%)* |  |  |  | 0.761 |
| No | 46(50.00) | 57(52.80) | 173(48.70) |  |
| Yes | 46(50.00) | 51(47.20) | 182(51.30) |  |
| Dri*nking,n(%)* |  |  |  | 0.426 |
| No | 57(62.00) | 71(65.70) | 209(58.90) |  |
| Yes | 35(38.00) | 37(34.30) | 146(41.10) |  |
| *Diabetes(%)* |  |  |  | 0.827 |
| No | 74(80.40) | 84(77.80) | 275(77.50) |  |
| Yes | 18(19.60) | 24(22.20) | 80(22.50) |  |
| *Hypertension(%)* |  |  |  | 0.159 |
| No | 13(14.10) | 27(25.00) | 75(21.10) |  |
| Yes | 79(85.90) | 81(78.00) | 280(78.90) |  |
| *Hyperlipidemia(%)* |  |  |  | 0.411 |
| No | 70(76.10) | 73(67.60) | 251(70.70) |  |
| Yes | 22(23.90) | 35(32.40) | 104(29.30) |  |
| *CVD(%)* |  |  |  | 0.553 |
| No | 70(76.10) | 75(69.40) | 261(73.50) |  |
| Yes | 22(23.90) | 33(30.60) | 94(26.50) |  |
| WBC(10^9/L) | 7.04(5.27,8.24) | 6.5(5.44,8.00) | 6.79(5.49,8.31) | 0.448 |
| Neu(10^9/L) | 4.21(3.46,5.18) | 3.83(3.00,4.90) | 4.04(3.19,5.20) | 0.284 |
| Lym(10^9/L) | 2.47(1.72,3.11) | 1.73(1.31,2.18) | 1.54(0.76,2.03) | <0.001 |
| Hb(g/dL) | 149.0±21.9 | 147.8±17.4 | 149.4±23.3 | 0.749 |
| PLT(10^9/L) | 243(196,290) | 226(179.25,266.75) | 221(180,270) | 0.080 |
| ALT(U/L) | 26.0(15.7,38.8) | 22.1(14.0,35.0) | 25.6(17.9,41.2) | 0.037 |
| AST(U/L) | 22.2(17.8,27.7) | 21.5(17.63,28.7) | 23(18.9,30.8) | 0.091 |
| ALB(g/L) | 42.4(39.0,45.3) | 40.6(37.3,42.88) | 39.4(3.06,42.2) | <0.001 |
| Cr(μmol/L) | 69.0(59.0,84.0) | 71.0(61.0,79.0) | 73.0(61.0,85.0) | 0.193 |
| BUN(mmol/L) | 5.10(4.36,6.25) | 5.10(4.00,6.08) | 5.40(4.50,6.40) | 0.047 |
| UA(μmol/L) | 369(288,439) | 355 (306,404) | 378 (342,439) | 0.003 |
| TC(mmol/L) | 1.97(1.36,2.67) | 1.64(1.13,2.41) | 2.12(1.48,2.63) | 0.004 |
| HDL(mmol/L) | 1.10(0.90,1.28) | 1.119(0.91,1.24) | 1.10(0.91,1.26) | 0.968 |
| PNI | 54.75±5.39 | 48.86±4.47 | 45.96±7.15 | <0.001 |

Notes: Continuous variables are presented as mean ± standard deviation (SD) or median (interquartile range, IQR), as appropriate based on data distribution. Categorical variables are presented as n (%). Comparisons among groups were performed using one-way analysis of variance (ANOVA) for normally distributed variables, Kruskal-Wallis test for non-normally distributed variables, and chi-square test for categorical variables. Abbreviations: BMI, body mass index; WBC, white blood cell count; Neu, neutrophils; Lym, lymphocytes; Hb, hemoglobin; PLT, platelet count; ALT, alanine aminotransferase; AST, aspartate aminotransferase; ALB, serum albumin; Cr, creatinine; BUN, blood urea nitrogen; UA, uric acid; TG, triglycerides; HDL-C, high-density lipoprotein cholesterol; CVD, cardiovascular disease; PNI, prognostic nutritional index.
